# Supplementary material for: Genetic Architecture of Variation in the Lateral Line Sensory System of Threespine Sticklebacks
Source: PubMed Central journal article supplement (PMC3429919; doi:10.1534/g3.112.003079), 2012-09-01
Supplement: supp_2.9.1047_TableS1.pdf [file supp_2.9.1047_TableS1.pdf]

**Table S1 SNP markers used for QTL mapping**

| Linkage group<br>(LG) | Map position<br>(cM) | Marker name<br>(chromosome:position) | NCBI assay ID<br>(ss#) |
|-----------------------|----------------------|--------------------------------------|------------------------|
| 1                     | 0                    | chrI:3310077                         | 244222768              |
| 1                     | 10.81                | chrI:7820850                         | 244222772              |
| 1                     | 11.03                | chrI:7955458                         | 120258413              |
| 1                     | 11.03                | chrI:7955618                         | 252841118              |
| 1                     | 12.53                | chrI:11963492                        | 120258415              |
| 1                     | 12.53                | chrI:12038660                        | 120258416              |
| 1                     | 37.52                | chrI:25201193                        | 252841111              |
| 1                     | 46.02                | chrI:21511782                        | 244223005              |
| 1                     | 46.02                | chrI:21951727                        | 252841103              |
| 2                     | 0                    | chrUn:23753128                       | 244222989              |
| 2                     | 0.46                 | chrII:418094                         | 244222780              |
| 2                     | 5.3                  | chrII:2829800                        | 252841149              |
| 2                     | 6.49                 | chrII:3131035                        | 252841121              |
| 2                     | 12.12                | chrII:4157699                        | 252841112              |
| 2                     | 16.64                | chrII:5590307                        | 252841076              |
| 2                     | 17.79                | chrII:5935944                        | 252841148              |
| 2                     | 20.58                | chrII:7203830                        | 252841170              |
| 2                     | 24.23                | chrII:8979491                        | 252841135              |
| 2                     | 29.97                | chrII:13353603                       | 244222783              |
| 2                     | 52.6                 | chrII:19985741                       | 244222785              |
| 2                     | 60.8                 | chrII:20714675                       | 252841046              |
| 2                     | 67.68                | chrII:21122542                       | 252841085              |
| 2                     | 78.99                | chrII:22443700                       | 244222787              |
| 3                     | 0                    | chrIII:1651721                       | 252841079              |
| 3                     | 16.07                | chrIII:10376395                      | 244222790              |
| 3                     | 22.43                | chrIII:12316694                      | 252841106              |
| 3                     | 25.24                | chrIII:13520975                      | 252841102              |
| 3                     | 30.25                | chrIII:14048561                      | 252841058              |
| 3                     | 31.55                | chrIII:14456990                      | 252841063              |
| 3                     | 44.24                | chrIII:15783657                      | 252841104              |
| 3                     | 48.21                | chrIII:16224572                      | 120258430              |
| 3                     | 48.26                | chrIII:16251071                      | 120258431              |
| 3                     | 56.19                | chrUn:33873966                       | 252841086              |
| 4                     | 0                    | chrIV:1020296                        | 252841071              |
| 4                     | 17.48                | chrIV:2858360                        | 252841155              |
| 4                     | 28.98                | chrIV:3764773                        | 252841050              |

|   |        |                |           |
|---|--------|----------------|-----------|
| 4 | 35.29  | chrIV:4599765  | 244222800 |
| 4 | 38.83  | chrIV:5867068  | 252841134 |
| 4 | 45.84  | chrIV:8579158  | 244223069 |
| 4 | 48     | chrIV:10812344 | 244223042 |
| 4 | 48.23  | chrIV:10960835 | 120258434 |
| 4 | 49.09  | chrIV:11367975 | 120258435 |
| 4 | 49.71  | chrIV:12005556 | 252841179 |
| 4 | 50.55  | chrIV:12817401 | 244223048 |
| 4 | 51.58  | chrIV:13850026 | 244223049 |
| 4 | 52.54  | chrIV:14325385 | 252841061 |
| 4 | 53.44  | chrIV:15052901 | 244222804 |
| 4 | 54.74  | chrIV:15530121 | 244222805 |
| 4 | 55.2   | chrIV:15737291 | 244222807 |
| 4 | 60.01  | chrIV:27614532 | 120258442 |
| 4 | 60.81  | chrIV:23970813 | 252841168 |
| 4 | 61.18  | chrIV:20957877 | 252841152 |
| 4 | 61.22  | chrIV:21605258 | 252841082 |
| 4 | 61.84  | chrIV:19812956 | 244223055 |
| 4 | 65.97  | chrIV:29763654 | 120258443 |
| 4 | 71.37  | chrIV:30568387 | 252841083 |
| 4 | 81.21  | chrIV:31583885 | 252841078 |
| 4 | 81.94  | chrIV:31611147 | 252841084 |
| 4 | 87.55  | chrIV:32092919 | 252841132 |
| 4 | 100.95 | chrUn:27402745 | 252841068 |
| 5 | 0      | chrUn:11621796 | 244222985 |
| 5 | 0      | chrUn:11980918 | 252841136 |
| 5 | 11.26  | chrV:7791830   | 252841093 |
| 5 | 23.71  | chrV:2528528   | 244222814 |
| 5 | 32.74  | chrV:8211082   | 252841163 |
| 5 | 32.74  | chrV:8214190   | 252841172 |
| 5 | 33.4   | chrV:8327818   | 244222816 |
| 5 | 41.29  | chrV:9768052   | 252841108 |
| 5 | 52.87  | chrV:10649179  | 252841089 |
| 5 | 58.72  | chrV:11316476  | 252841077 |
| 5 | 63.19  | chrUn:25691760 | 252841096 |
| 6 | 0      | chrVI:11873663 | 120258454 |
| 6 | 3.78   | chrVI:13220597 | 252841044 |
| 6 | 4.88   | chrVI:13514193 | 252841099 |
| 6 | 5.98   | chrVI:13682067 | 252841110 |

|   |       |                  |           |
|---|-------|------------------|-----------|
| 6 | 7.08  | chrVI:14131973   | 252841117 |
| 7 | 0     | chrUn:28671327   | 244222995 |
| 7 | 0     | chrUn:29087782   | 244222996 |
| 7 | 0     | chrVII:537136    | 252841113 |
| 7 | 0.22  | chrVII:286225    | 252841088 |
| 7 | 4.65  | chrVII:835236    | 252841091 |
| 7 | 44.23 | chrVII:5552972   | 252841066 |
| 7 | 44.47 | chrVII:5936068   | 120258457 |
| 7 | 46.25 | chrUn:7866784    | 252841054 |
| 7 | 47.81 | chrVII:13205977  | 252841062 |
| 7 | 47.81 | chrVII:13452516  | 244222836 |
| 7 | 47.81 | chrVII:13525838  | 244222837 |
| 7 | 49.03 | chrVII:15237354  | 252841075 |
| 7 | 51.37 | chrVII:17992851  | 252841176 |
| 7 | 51.37 | chrVII:17994452  | 252841175 |
| 7 | 51.37 | chrVII:17997544  | 252841166 |
| 7 | 51.37 | chrVII:18353106  | 244222839 |
| 7 | 51.44 | chrVII:17995892  | 120258458 |
| 7 | 52.04 | chrVII:20883742  | 252841067 |
| 7 | 57.33 | chrVII:22842571  | 252841120 |
| 7 | 60.09 | chrVII:23463111  | 252841116 |
| 7 | 67.21 | chrVII:24610097  | 252841098 |
| 7 | 83.34 | chrVII:26448674  | 252841125 |
| 7 | 95.8  | chrVII:27757015  | 252841145 |
| 8 | 0     | chrVIII:1293153  | 252841114 |
| 8 | 1.81  | chrVIII:1929053  | 244222843 |
| 8 | 12.55 | chrVIII:3987295  | 120258464 |
| 8 | 13.85 | chrVIII:4503012  | 244222845 |
| 8 | 17.51 | chrVIII:9763365  | 252841173 |
| 8 | 17.51 | chrVIII:9768150  | 252841162 |
| 8 | 17.51 | chrVIII:9849962  | 252841092 |
| 8 | 19.22 | chrVIII:12472630 | 252841158 |
| 8 | 20.8  | chrVIII:13577518 | 252841097 |
| 8 | 20.78 | chrVIII:13613729 | 244222847 |
| 8 | 21.19 | chrVIII:3455699  | 252841156 |
| 8 | 23.9  | chrVIII:14472465 | 244222848 |
| 8 | 52.4  | chrVIII:17359071 | 252841141 |
| 9 | 0     | chrIX:5403530    | 120258474 |
| 9 | 4.07  | chrIX:6126845    | 252841056 |

|    |       |                 |           |
|----|-------|-----------------|-----------|
| 9  | 14.89 | chrIX:8586014   | 244223070 |
| 9  | 15.36 | chrIX:8851078   | 252841178 |
| 9  | 15.36 | chrIX:8852807   | 244223071 |
| 9  | 20.03 | chrIX:12982163  | 244222866 |
| 9  | 20.03 | chrIX:13553866  | 252841127 |
| 9  | 20.04 | chrIX:12869521  | 252841147 |
| 9  | 32.19 | chrIX:2251670   | 252841064 |
| 9  | 54.63 | chrIX:803523    | 252841065 |
| 10 | 0     | chrX:5784504    | 252841138 |
| 10 | 1.08  | chrX:7113953    | 120258483 |
| 10 | 4.04  | chrX:8703061    | 120258485 |
| 10 | 4.45  | chrX:8877592    | 252841109 |
| 10 | 5.2   | chrX:9396721    | 252841115 |
| 10 | 5.82  | chrX:9829411    | 252841153 |
| 10 | 6.18  | chrX:10415917   | 252841095 |
| 10 | 8.98  | chrX:11139448   | 252841128 |
| 10 | 9.92  | chrX:11252137   | 244222875 |
| 10 | 50.14 | chrX:14265366   | 120258486 |
| 10 | 50.58 | chrX:14456479   | 252841100 |
| 10 | 50.58 | chrX:14549101   | 252841122 |
| 10 | 50.58 | chrX:15290785   | 252841137 |
| 11 | 0     | chrXI:5472842   | 244223076 |
| 11 | 0     | chrXI:5652180   | 244223077 |
| 11 | 0     | chrXI:5653380   | 244223079 |
| 11 | 0     | chrXI:5708414   | 244222881 |
| 11 | 0     | chrXI:5845597   | 244223081 |
| 11 | 0     | chrXI:5845760   | 252841177 |
| 11 | 5.09  | chrXI:9039275   | 252841094 |
| 12 | 0     | chrXII:548804   | 252841119 |
| 12 | 23.19 | chrXII:1969537  | 252841070 |
| 12 | 24.1  | chrXII:2181073  | 252841129 |
| 12 | 29.21 | chrXII:13151981 | 244223083 |
| 12 | 29.44 | chrXII:13151755 | 244223082 |
| 12 | 29.44 | chrXII:14223760 | 244222895 |
| 12 | 29.51 | chrXII:14346080 | 244223084 |
| 12 | 29.51 | chrXII:14353450 | 244222896 |
| 12 | 32.23 | chrXII:10243906 | 252841053 |
| 12 | 32.62 | chrXII:10246245 | 252841052 |
| 12 | 39.82 | chrXII:6399147  | 252841133 |

|     |       |                  |           |
|-----|-------|------------------|-----------|
| 13  | 0     | chrXIII:1001571  | 120258503 |
| 13  | 11.03 | chrXIII:2523163  | 120258505 |
| 13  | 28.29 | chrXIII:12083700 | 252841126 |
| 13  | 31.84 | chrXIII:14401483 | 252841160 |
| 13  | 33.87 | chrXIII:15462116 | 244222903 |
| 13  | 47.09 | chrXIII:17896505 | 252841131 |
| 13  | 57.72 | chrXIII:18470329 | 252841124 |
| 13  | 62.68 | chrXIII:19311265 | 252841123 |
| 13  | 73.66 | chrXIII:19824333 | 252841080 |
| 13  | 74.12 | chrXIII:19693259 | 244222906 |
| 14a | 0     | chrXIV:10399121  | 244222910 |
| 14a | 0.43  | chrXIV:11360680  | 252841142 |
| 14a | 1.95  | chrXIV:14049917  | 252841090 |
| 14b | 0     | chrXIV:265589    | 252841057 |
| 14b | 0     | chrUn:36334731   | 244223000 |
| 14b | 0.46  | chrUn:38561237   | 252841055 |
| 14b | 2.7   | chrXIV:451065    | 120258511 |
| 15  | 0     | chrXV:7198078    | 252841171 |
| 15  | 0     | chrXV:7200442    | 244223089 |
| 15  | 25.15 | chrXV:14693722   | 244222917 |
| 16  | 0     | chrXVI:2483136   | 252841051 |
| 16  | 16.39 | chrXVI:5562355   | 244222924 |
| 16  | 25.61 | chrXVI:12111717  | 120258526 |
| 16  | 34.81 | chrXVI:14550048  | 252841073 |
| 16  | 35.94 | chrXVI:14688989  | 252841047 |
| 16  | 49.97 | chrXVI:16058672  | 252841101 |
| 16  | 56.79 | chrXVI:17506151  | 252841081 |
| 16  | 57.48 | chrXVI:17347559  | 244223091 |
| 16  | 63.94 | chrUn:26389255   | 244222992 |
| 16  | 66.27 | chrUn:17922401   | 120258570 |
| 17  | 0     | chrXVII:3906379  | 244222942 |
| 17  | 5.33  | chrUn:2632376    | 252841074 |
| 17  | 5.33  | chrUn:2776586    | 120258568 |
| 17  | 15.19 | chrXVII:11037958 | 252841072 |
| 17  | 28.53 | chrXVII:12528572 | 252841151 |
| 17  | 28.98 | chrXVII:12599208 | 252841154 |
| 17  | 33.18 | chrXVII:13079654 | 252841130 |
| 17  | 34.93 | chrXVII:13481178 | 120258537 |
| 17  | 36.82 | chrXVII:13795831 | 252841087 |

|    |       |                   |           |
|----|-------|-------------------|-----------|
| 18 | 0     | chrXVIII:4836241  | 120258539 |
| 18 | 0     | chrXVIII:5765162  | 120258540 |
| 18 | 9.16  | chrXVIII:9955470  | 244222951 |
| 18 | 12.95 | chrXVIII:11086837 | 120258542 |
| 18 | 19.35 | chrXVIII:12273872 | 252841150 |
| 18 | 19.4  | chrXVIII:12501504 | 244222956 |
| 18 | 35.62 | chrXVIII:14415132 | 120258548 |
| 19 | 0     | chrXIX:583166     | 252841105 |
| 19 | 0.87  | chrXIX:646137     | 252841146 |
| 19 | 4.84  | chrXIX:728155     | 120258550 |
| 19 | 40.33 | chrXIX:2524840    | 252841167 |
| 19 | 40.33 | chrXIX:2459466    | 244235762 |
| 19 | 40.33 | chrXIX:2464070    | 244235760 |
| 19 | 40.33 | chrXIX:2467932    | 244235759 |
| 19 | 40.33 | chrXIX:2477173    | 244235761 |
| 19 | 40.44 | chrXIX:2526286    | 244223087 |
| 19 | 40.51 | chrXIX:2550417    | 252841164 |
| 19 | 44.69 | chrXIX:18043409   | 252841059 |
| 19 | 47.63 | chrXIX:14796728   | 244223085 |
| 19 | 47.86 | chrXIX:15207098   | 252841144 |
| 19 | 47.86 | chrXIX:14798132   | 244223086 |
| 19 | 47.99 | chrXIX:14799088   | 252841180 |
| 19 | 48.72 | chrXIX:13466609   | 244222961 |
| 19 | 51.64 | chrXIX:10552047   | 252841043 |
| 19 | 53.45 | chrXIX:7848104    | 252841069 |
| 20 | 0     | chrXX:3608355     | 244223093 |
| 20 | 11.51 | chrXX:8918466     | 244222964 |
| 20 | 11.52 | chrXX:8905625     | 244222963 |
| 20 | 13.51 | chrXX:12436776    | 252841049 |
| 20 | 13.73 | chrXX:12810044    | 252841048 |
| 20 | 15.32 | chrXX:13893619    | 252841139 |
| 20 | 15.53 | chrXX:14411783    | 252841159 |
| 20 | 24.43 | chrXX:16253512    | 252841060 |
| 20 | 31.8  | chrXX:16912820    | 252841161 |
| 20 | 31.85 | chrXX:16910805    | 252841165 |
| 20 | 40.2  | chrXX:17494242    | 252841140 |
| 20 | 58.45 | chrXX:232763      | 244223092 |
| 21 | 0     | chrUn:5488093     | 244222984 |
| 21 | 3.42  | chrUn:6889743     | 244222988 |

|    |       |                 |           |
|----|-------|-----------------|-----------|
| 21 | 3.84  | chrUn:7381868   | 252841045 |
| 21 | 4.06  | chrXXI:774193   | 252841169 |
| 21 | 5.4   | chrXXI:1893294  | 252841157 |
| 21 | 8.78  | chrXXI:5716516  | 252841174 |
| 21 | 8.78  | chrXXI:5793103  | 244222975 |
| 21 | 8.78  | chrXXI:7002178  | 244222977 |
| 21 | 9.22  | chrXXI:7904439  | 252841107 |
| 21 | 23.01 | chrXXI:10007883 | 120258564 |
| 21 | 23.65 | chrXXI:10156751 | 252841143 |
| 21 | 37.51 | chrXXI:11060209 | 120258566 |
| 21 | 56.07 | chrXXI:11414383 | 120258567 |

---

For each SNP marker, the linkage group (LG) and map position in the linkage group in centimorgans (cM) is shown. Marker names are based on the position (chromosome and position in basepairs) of the SNP marker in the initial stickleback genome assembly (Broad S1, Feb 2006). For SNP markers identified from unassembled regions of the genome (chrUN), the position in basepairs is based on the composition chrUN in the UCSC genome browser. SNP marker information can be obtained using the NCBI assay ID (ss#) at <http://www.ncbi.nlm.nih.gov/projects/SNP/>
